# Supplementary material for: Increasing the power of meta-analysis of genome-wide association studies to detect heterogeneous effects
Source: PubMed Central journal article supplement — Bioinformatics. 2017 Jul 12;33(14):i379–88. doi: 10.1093/bioinformatics/btx242 (PMC5870848; doi:10.1093/bioinformatics/btx242), 2017-07-12
Supplement: btx242_supp.pdf [file btx242_supp.pdf]

# Supplementary Materials for “Increasing the power of meta-analysis of genome-wide association studies to detect heterogeneous effects”

Lee et al.

## Supplementary Tables

**Table S1.** List of variants collected from papers that cited RE2. We obtained list of all 60 papers that cited RE2 as of 09/01/2015 (Google Scholar). We thoroughly examined all papers one by one and collected information of variants whose effect sizes and standard errors were available in the manuscript and whose p-values were  $p_{FE} < 5 \times 10^{-6}$ , and  $p_{RE2} < 5 \times 10^{-6}$ . Then we selected SNPs with large heterogeneity such that  $p_{RE2} < p_{FE}$ . Finally, we selected the most significant SNP per locus which gave us 7 SNPs below. The best p-value among all methods is in bold-face.

| Study                                                      | Disease       | N  | Ncase | Ncont | RSID       | Chr | Pos       | Gene           | Methods |    |        |          |            |          |                 |
|------------------------------------------------------------|---------------|----|-------|-------|------------|-----|-----------|----------------|---------|----|--------|----------|------------|----------|-----------------|
|                                                            |               |    |       |       |            |     |           |                | A1      | A2 | RAF    | FE       | RE         | RE2      | RE2C            |
| Sapkota <i>et al</i><br>(Sapkota <i>et al.</i> , 2014)     | endometriosis | 4  | 5300  | 10218 | rs6542095  | 2   | 112771606 | IL1A           | C       | T  | 0.3796 | 5.04E-07 | 0.00421952 | 9.59E-08 | <b>3.49E-08</b> |
| Lee <i>et al</i><br>(Lee <i>et al.</i> , 2014)             | COPD          | 3  | 1662  | 3520  | s147862429 | 11  | 906896    | CHID1          | T       | C  | 0.05   | 7.95E-08 | 0.454112   | 7.34E-09 | <b>4.06E-09</b> |
| Rahmioglu <i>et al</i><br>(Rahmioglu <i>et al.</i> , 2014) | endometriosis | 8  | 7718  | 32678 | rs12700667 | 7   | 25862019  | NFE2L3, HOXA10 | A       | G  | 0.2    | 7.16E-11 | 4.52E-05   | 3.97E-11 | <b>1.38E-11</b> |
| Rahmioglu <i>et al</i>                                     | endometriosis | 5  | 4677  | 26866 | rs4141819  | 2   | 67637543  | -              | C       | T  | 0.22   | 1.60E-07 | 0.00227247 | 8.55E-08 | <b>3.44E-08</b> |
| Kirylyuk <i>et al</i><br>(Kirylyuk <i>et al.</i> , 2012)   | IgAN          | 13 | 5397  | 5443  | rs9275596  | 6   | 32713854  | DQB1,DRB1      | C       | T  | 0.2326 | 4.97E-32 | 2.55E-16   | 3.12E-32 | <b>6.55E-33</b> |
| Kirylyuk <i>et al</i>                                      | IgAN          | 13 | 5397  | 5443  | rs2071543  | 6   | 32843852  | PSMB8          | T       | C  | 0.152  | 5.74E-10 | 0.0202512  | 3.95E-11 | <b>1.52E-11</b> |
| Perry <i>et al</i><br>(Perry <i>et al.</i> , 2012)         | T2D           | 15 | 4993  | 70632 | rs8090011  | 18  | 7068463   | LAMA1          | G       | A  | 0.38   | 1.13E-08 | 3.74E-05   | 1.05E-09 | <b>5.12E-10</b> |

## References

- Kirylyuk, K. *et al.* (2012) Geographic Differences in Genetic Susceptibility to IgA Nephropathy: GWAS Replication Study and Geospatial Risk Analysis. *PLoS Genet*, **8**.
- Lee, J.H. *et al.* (2014) Genetic susceptibility for chronic bronchitis in chronic obstructive pulmonary disease. *Respir. Res.*, **15**.
- Perry, J.R.B. *et al.* (2012) Stratifying type 2 diabetes cases by BMI identifies genetic risk variants in LAMA1 and enrichment for risk variants in lean compared to obese cases. *PLoS Genet*, **8**, e1002741.
- Rahmioglu, N. *et al.* (2014) Genetic variants underlying risk of endometriosis: insights from meta-analysis of eight genome-wide association and replication datasets. *Human Reproduction Update*, **20**, 702–716.
- Sapkota, Y. *et al.* (2014) Association between endometriosis and the interleukin 1A (IL1A) locus. *Human Reproduction*, **30**, 239–248.
